# Supplementary material for: Pedigree-based QTL analysis of flower size traits in two multi-parental diploid rose populations
Source: PubMed Central journal article supplement (PMC10464838; doi:10.3389/fpls.2023.1226713), 2023-08-15
Supplement: Image_1.pdf [file Image_1.pdf]

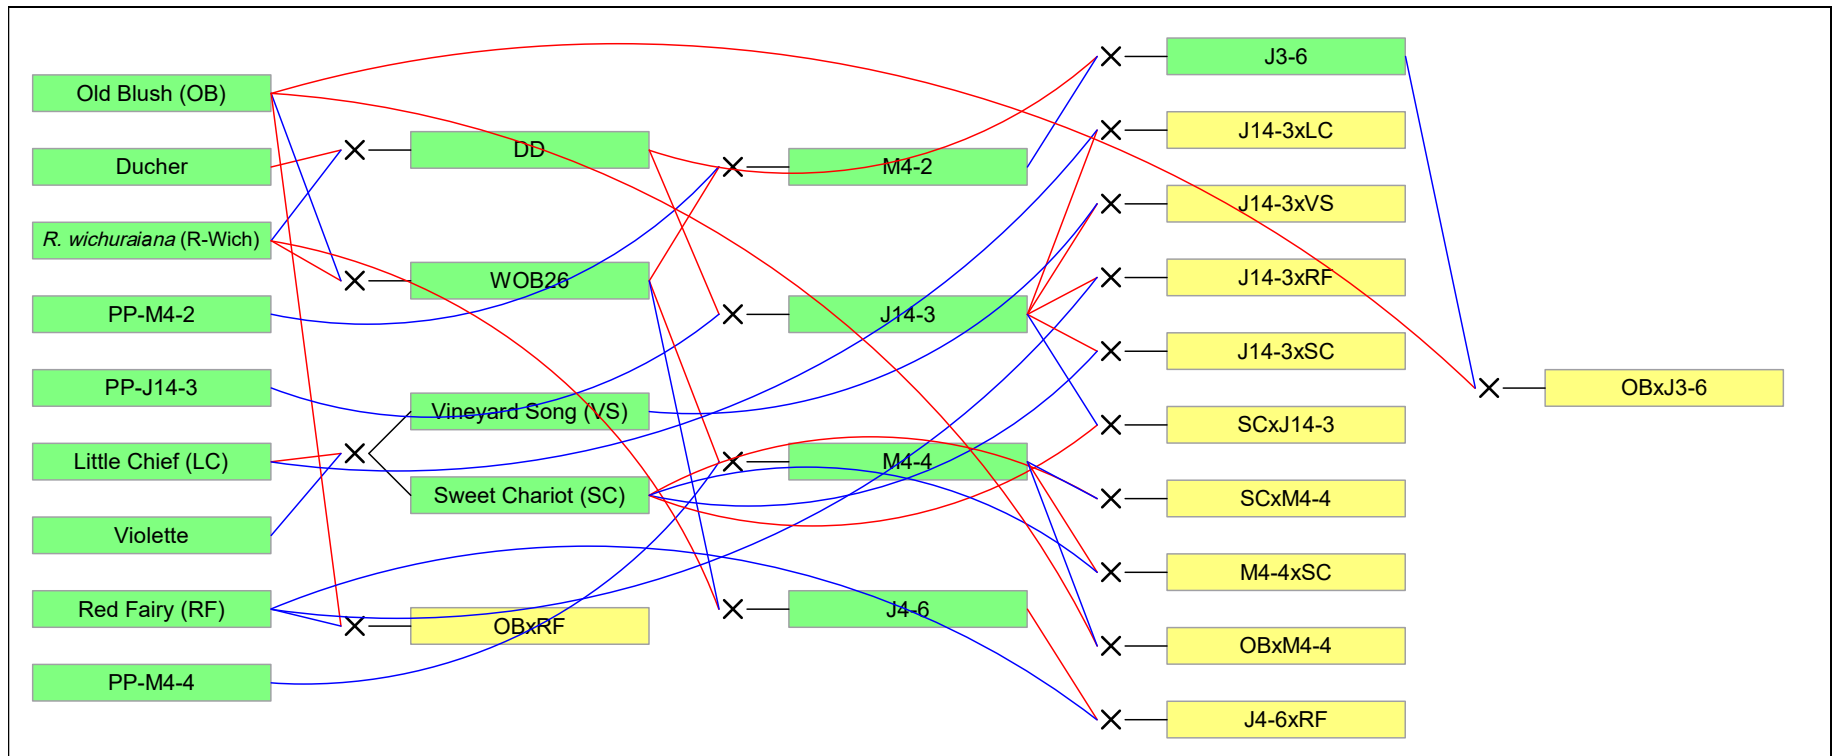

**Supplementary Figure 1.** Pedigree of the TX2WOB multi-parental population composed of 11 F<sub>1</sub> diploid rose populations derived from intercrossing nine genotypes. Red and blue lines link progeny to female and male parents, respectively, generated using PediMap 1.2.
