# Supplementary material for: Pedigree-based QTL analysis of flower size traits in two multi-parental diploid rose populations
Source: PubMed Central journal article supplement (PMC10464838; doi:10.3389/fpls.2023.1226713), 2023-08-15
Supplement: Image_2.pdf [file Image_2.pdf]

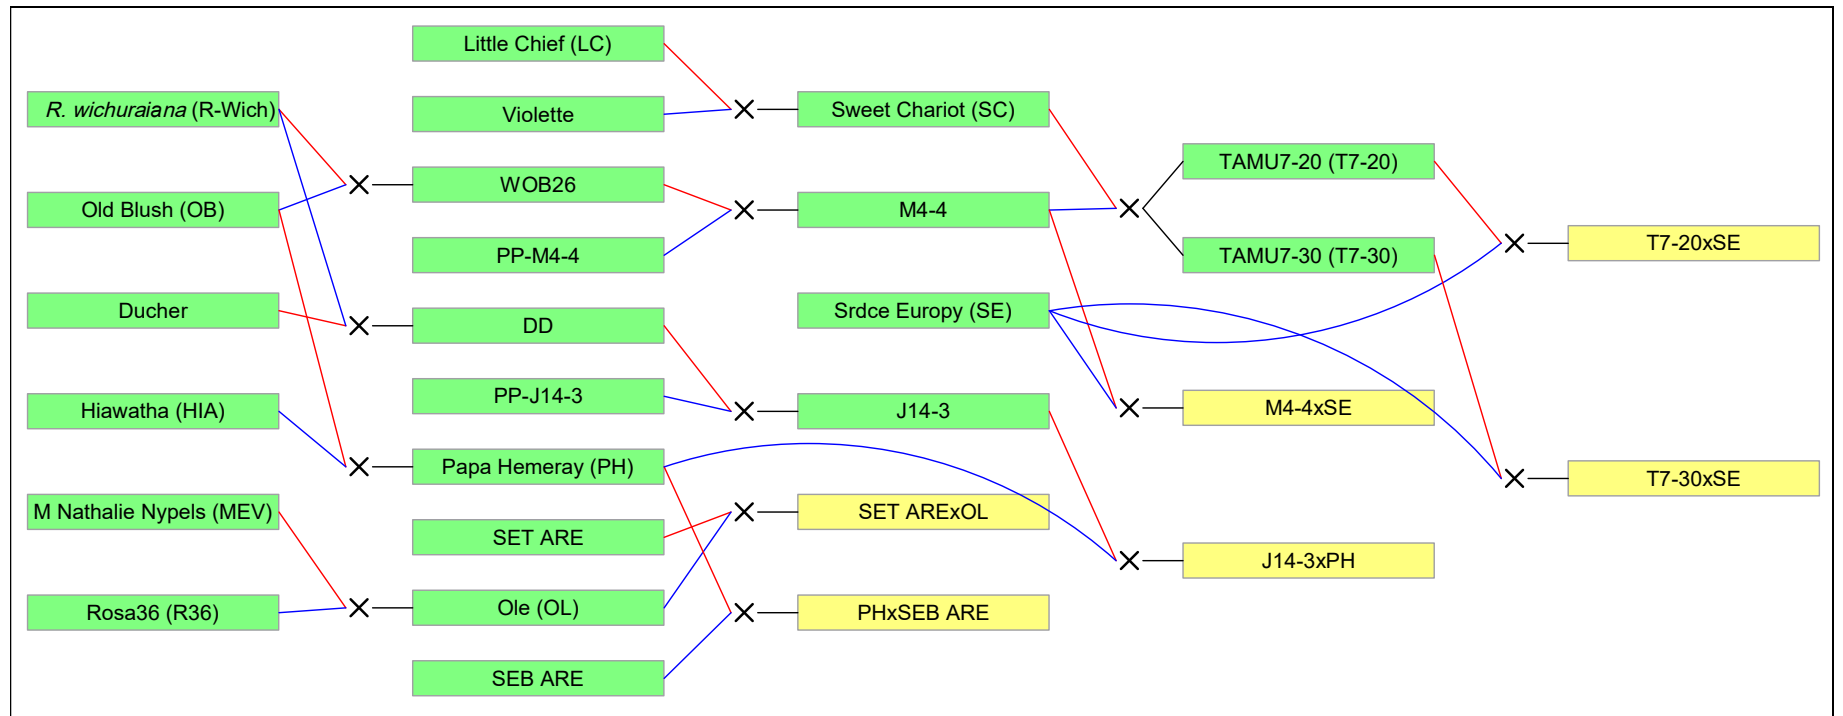

**Supplementary Figure 2.** Pedigree of the TX2WSE multi-parental population composed of six F<sub>1</sub> diploid rose populations derived from nine parents. Red and blue lines link progeny to female and male parents, respectively, generated using PediMap 1.2.

SET-ARE = *R. setigera*-ARE, SEB-ARE = *R. palustris* f. *plena* EB-ARE.
