# Supplementary material for: Pedigree-based QTL analysis of flower size traits in two multi-parental diploid rose populations
Source: PubMed Central journal article supplement (PMC10464838; doi:10.3389/fpls.2023.1226713), 2023-08-15
Supplement: Image_3.pdf [file Image_3.pdf]

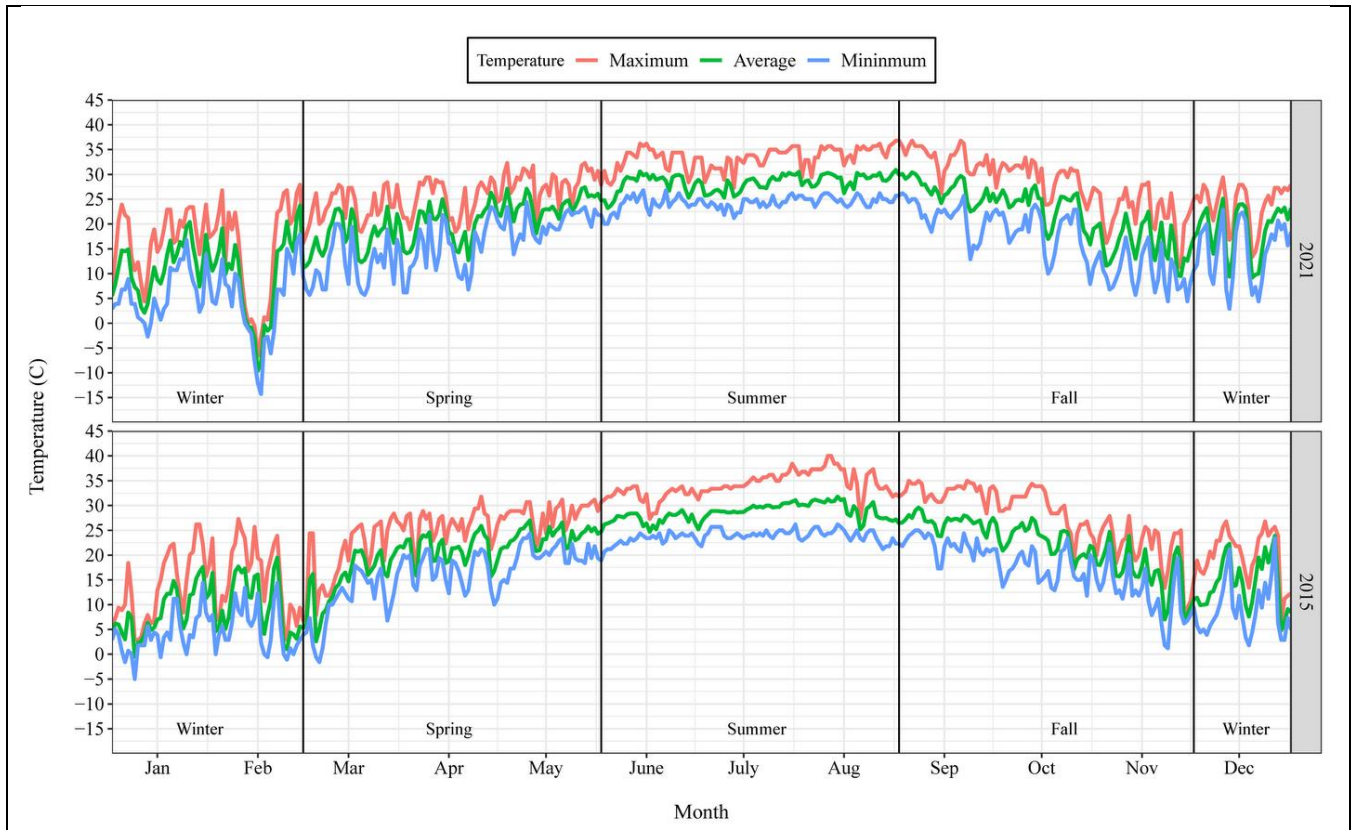

**Supplementary Figure 3.** Daily maximum, minimum and average temperature in 2015 and 2021 in College Station, Texas.
