# Supplementary material for: Pedigree-based QTL analysis of flower size traits in two multi-parental diploid rose populations
Source: PubMed Central journal article supplement (PMC10464838; doi:10.3389/fpls.2023.1226713), 2023-08-15
Supplement: Image_9.pdf [file Image_9.pdf]

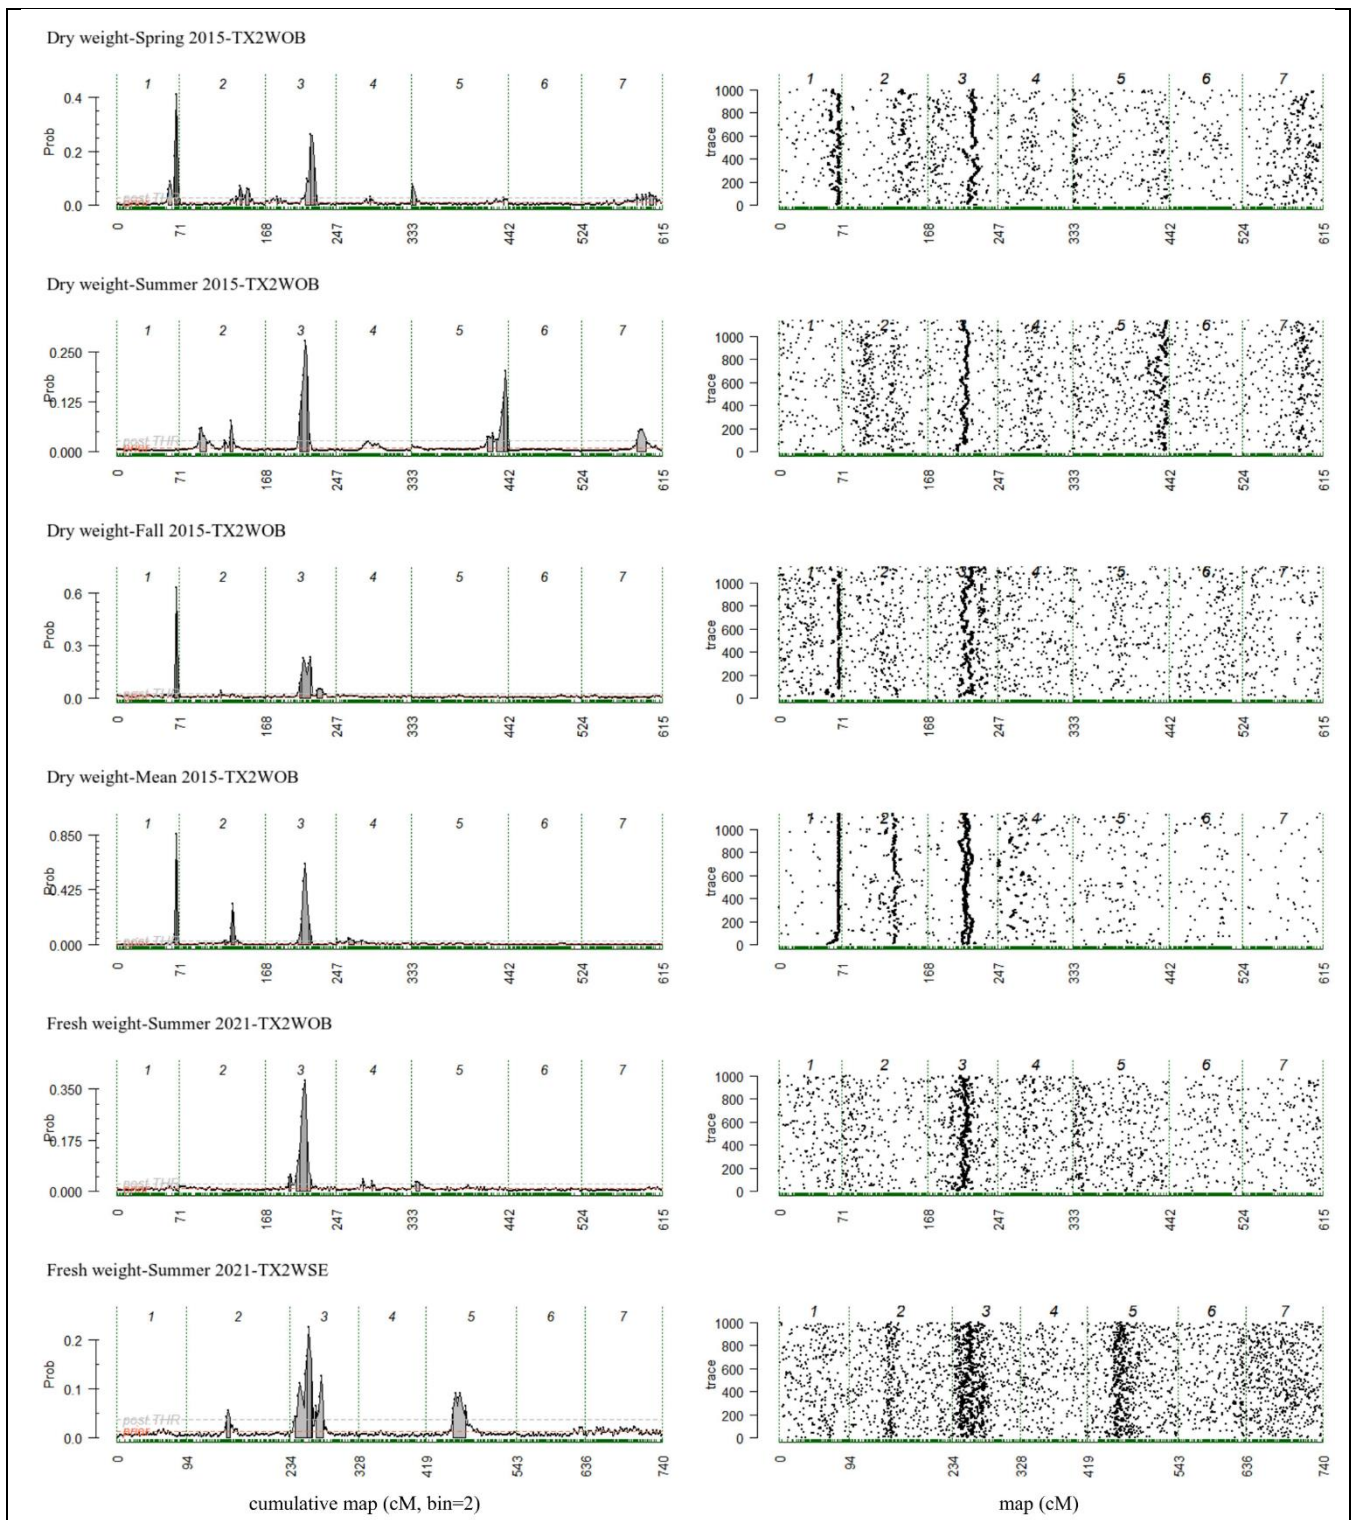

**Supplementary Figure 9.** Posterior positions (left) and trace samples QTL positions (right) based on an additive model performed using Visual FlexQTL software for dry weight phenotyped in Texas in spring, summer, fall, and the mean in 2015 for TX2WOB diploid rose population in College Station, and for fresh weight in summer 2021 for TX2WOB and TX2WSE in Somerville.
