# Supplementary material for: Pedigree-based QTL analysis of flower size traits in two multi-parental diploid rose populations
Source: PubMed Central journal article supplement (PMC10464838; doi:10.3389/fpls.2023.1226713), 2023-08-15
Supplement: Image_14.pdf [file Image_14.pdf]

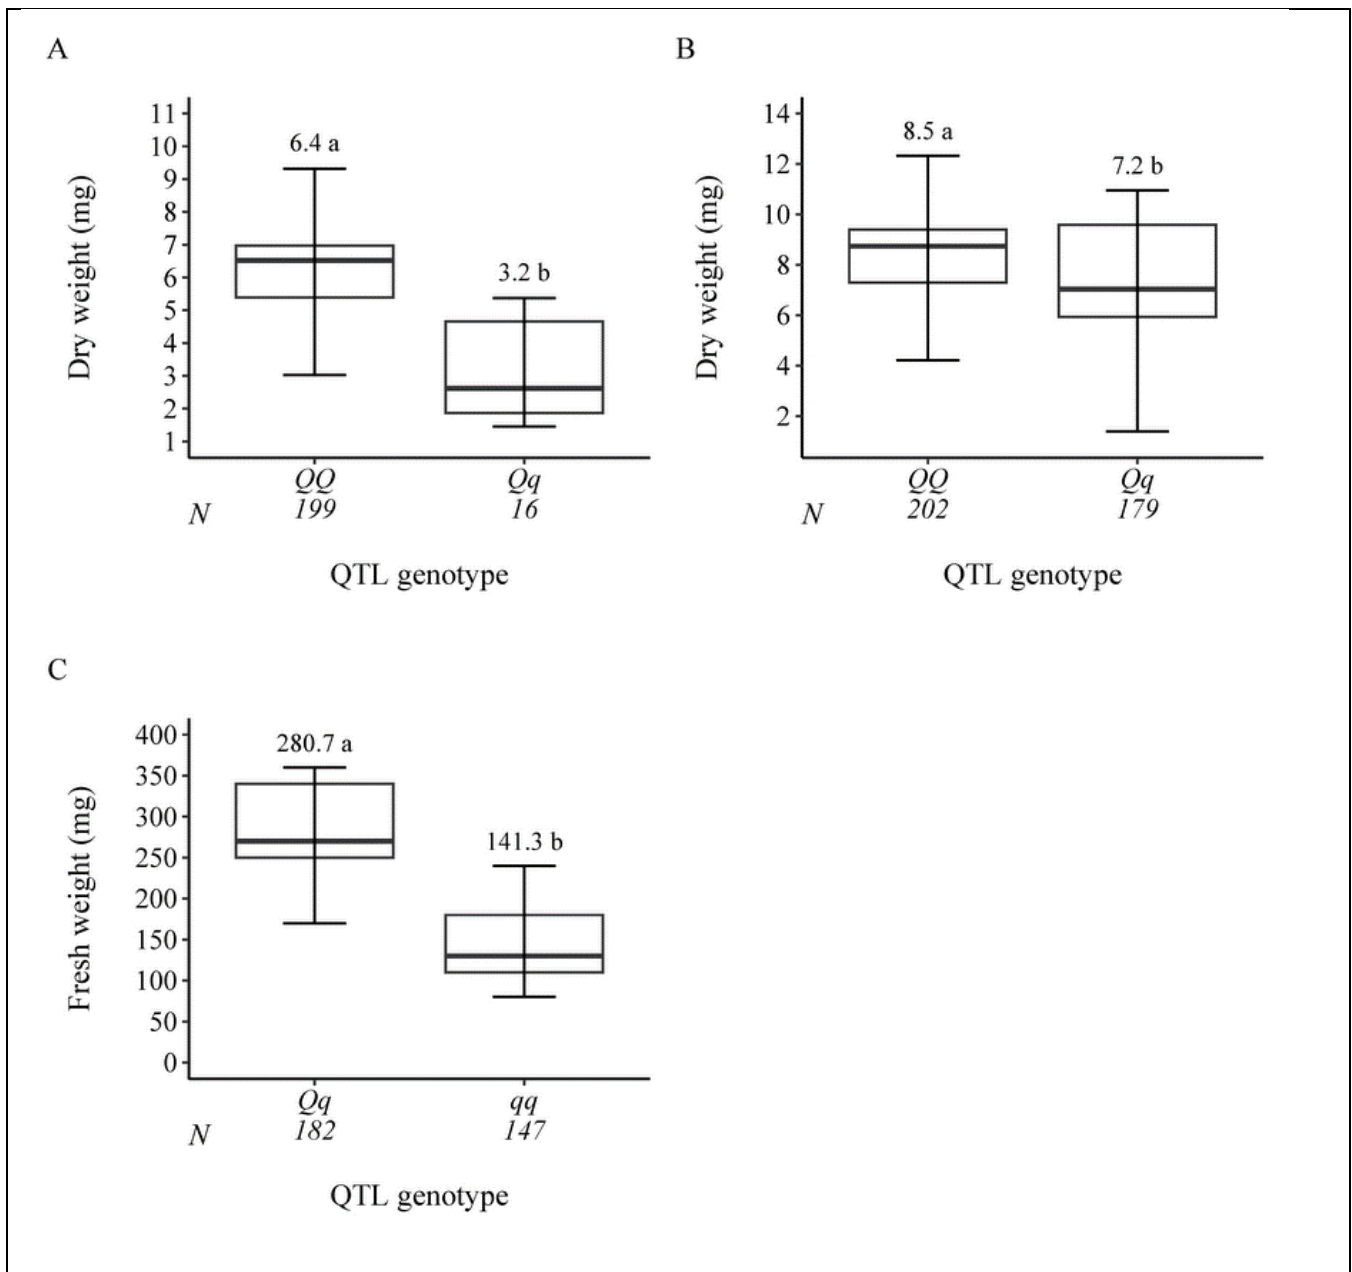

**Supplementary Figure 14.** Probable QTL genotype at the signal peak from all progenies for flower dry weight and fresh weight QTLs of diploid rose populations *qDWT.TX2WOB-LG1*(A) and *qDWT.TX2WOB-LG3* (B) for TX2WOB and *qFWT.TX2WSE-LG3* (C) for TX2WSE.

Means not connected by the same letter are significantly different ( $P < 0.05$ ) within each linkage group.
