# Supplementary material for: Pedigree-based QTL analysis of flower size traits in two multi-parental diploid rose populations
Source: PubMed Central journal article supplement (PMC10464838; doi:10.3389/fpls.2023.1226713), 2023-08-15
Supplement: Image_16.pdf [file Image_16.pdf]

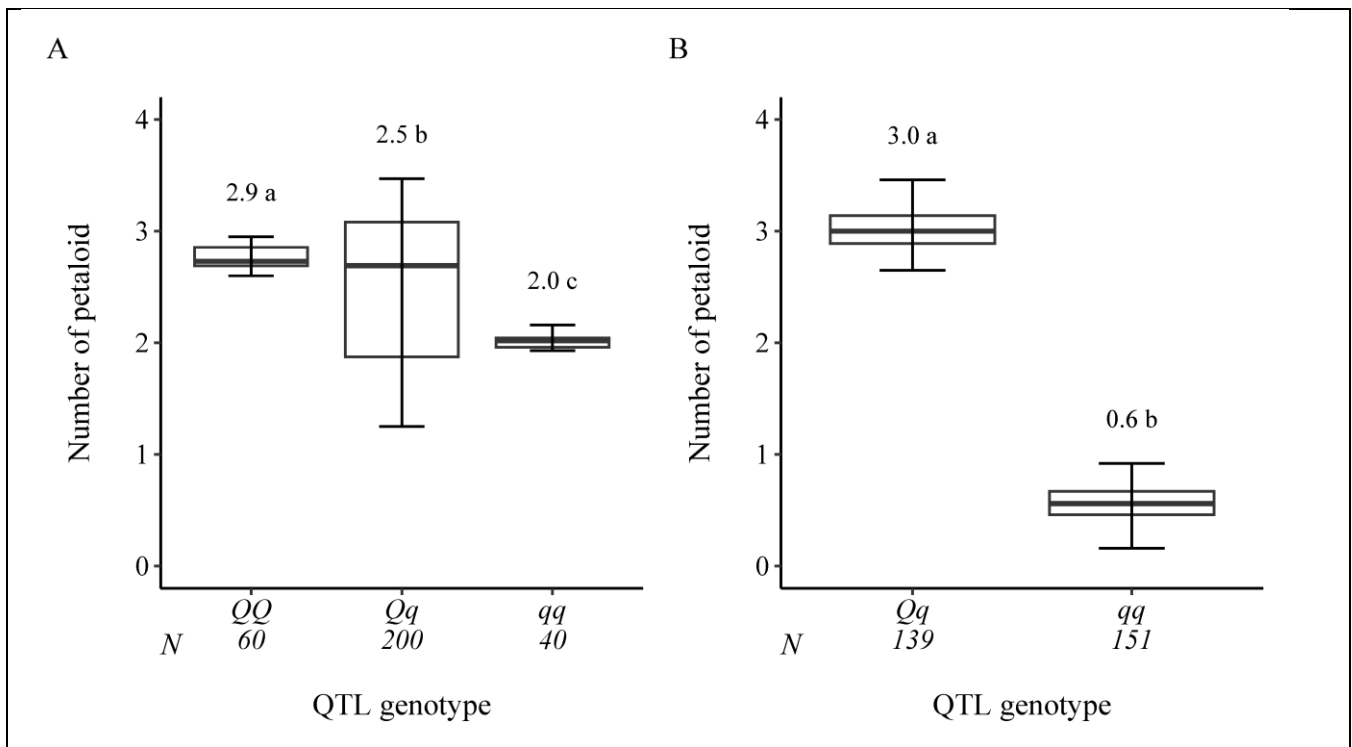

**Supplementary Figure 16.** Probable QTL genotype at the signal peak from all progenies for number of petaloid QTLs of diploid rose populations  $qPD.TX2WOB-LG3$  (A) and  $qPD.TX2WSE-LG3$  (B) for TX2WOB and TX2WSE, respectively.

Means not connected by the same letter are significantly different ( $P < 0.05$ ) within each linkage group.
