# Supplementary material for: Pedigree-based QTL analysis of flower size traits in two multi-parental diploid rose populations
Source: PubMed Central journal article supplement (PMC10464838; doi:10.3389/fpls.2023.1226713), 2023-08-15
Supplement: Image_17.pdf [file Image_17.pdf]

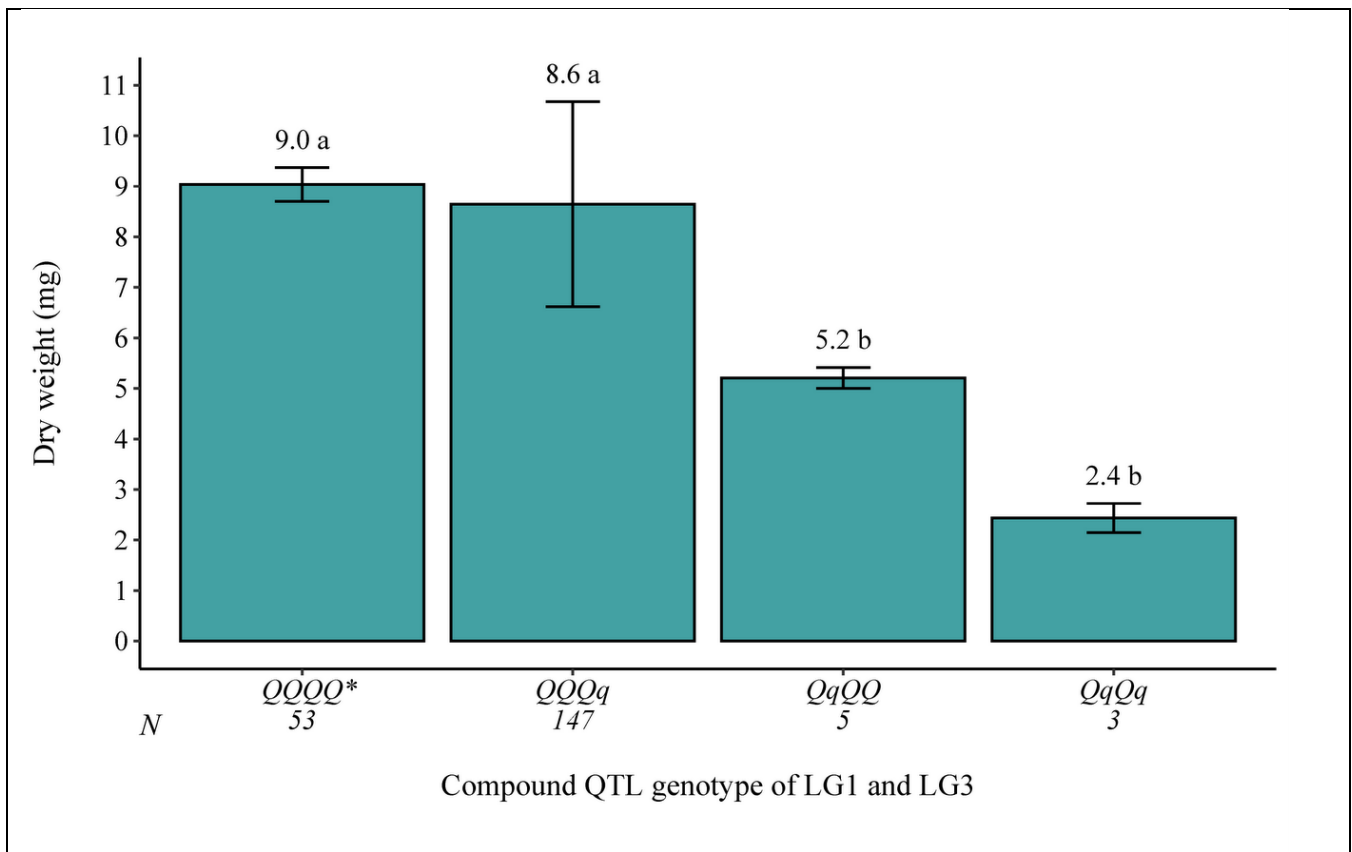

**Supplementary Figure 17.** Analysis of the compound QTL genotypes from *qDWT.TX2WOB-LG1* and *qDWT.TX2WOB-LG3* on dry weight from all progenies in TX2WOB population. Means not connected by the same letter are significantly different ( $P < 0.05$ ).

\* The 1<sup>st</sup> and 2<sup>nd</sup> pairs of QTL alleles are for the LG1 and LG3 QTLs, respectively.

N = Sample size
