# Supplementary material for: Pedigree-based QTL analysis of flower size traits in two multi-parental diploid rose populations
Source: PubMed Central journal article supplement (PMC10464838; doi:10.3389/fpls.2023.1226713), 2023-08-15
Supplement: Image_18.pdf [file Image_18.pdf]

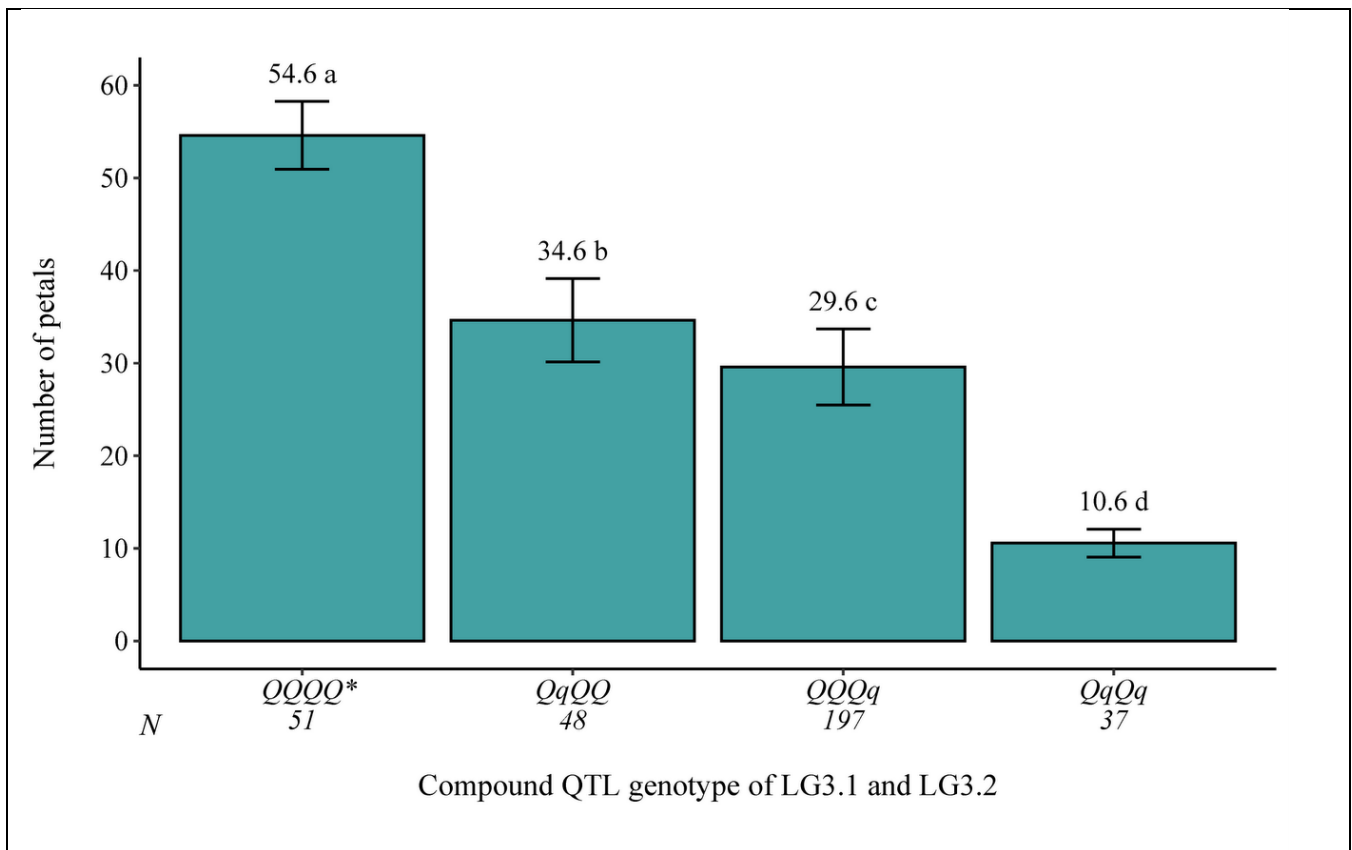

**Supplementary Figure 18.** Analysis of the compound QTL genotypes from *q*NP.TX2WOB-LG3.1 and *q*NP.TX2WOB-LG3.2 on number of petals from all progenies in TX2WOB population. Means not connected by the same letter are significantly different ( $P < 0.05$ ).

\* The 1<sup>st</sup> and 2<sup>nd</sup> pairs of QTL alleles are for the LG3.1 and LG3.2 QTLs, respectively.

N = Sample size
